# Supplementary material
Source: ML conference proceedings conference paper supplement (https://openaccess.thecvf.com/content/CVPR2025/html/Matsuki_4DTAM_Non-Rigid_Tracking_CVPR_2025_paper.html)
Supplement: Supplementary file 1 [file Matsuki_4DTAM_Non-Rigid_Tracking_CVPR_2025_supplemental.pdf]

# 4DTAM: Non-Rigid Tracking and Mapping via Surface Gaussian Splatting

## Supplementary Material

We encourage readers to watch the supplementary video for additional details and qualitative results.

### 1. Implementation Details

#### 1.1. System Details and Hyper parameters

**Non-Rigid SLAM:** We set the learning weights as follows:  $\lambda_p = 0.9$ ,  $\lambda_g = 0.1$ ,  $\lambda_{iso} = 10.0$  and  $\lambda_n = 0.002$ . For the ARAP regularization [2], we use a nearest neighbor count of 20, a radius of 0.05, and an exponential decay weight of 500. Keyframes are selected with  $N = 1$ . For the MLP, we use an 8-layer architecture with 256 neurons per layer. Frequency encoding is set to 1 for time and 4 for position. MLP is implemented with CUDA-optimized CutlassMLP in tiny-cuda-nn [4] for the fast optimization.

**Static SLAM Ablation:** We followed the same hyperparameters as MonoGS [3], but we use normal loss  $L_n$  with the weight  $\lambda_n = 0.01$  for the entire mapping process and  $\lambda_g = 0.5$  for the final refinement. For the Replica 3D reconstruction evaluation, we have used the script introduced in [5].

#### Offline Non-rigid RGB-D Reconstruction Ablation:

Camera poses are provided by the dataset and remain fixed during training. For the MLP, we adopt the same architecture described in [9], consisting of an 8-layer network with 256 dimensions per layer, where a concatenated feature vector is input to the fourth layer. The positional encoding frequencies are set to 6 for time and 10 for position. Following the approach in [1, 7], we evaluate the geometric and appearance metrics against the input views and report the average values.

### 2. Camera Pose Jacobian

We provide the detail of the derivation of camera pose jacobian of 2D Gaussian Splatting in ??.

We use the notation from [6]. Let  $T \in SE(3)$  and  $\tau = (\rho, \theta) \in \mathfrak{se}(3)$ , the left-side partial derivative on the manifold is defined as:

$$\frac{\mathcal{D}f(T)}{\mathcal{D}T} \triangleq \lim_{\tau \rightarrow 0} \frac{\text{Log}(f(\text{Exp}(\tau) \circ T) \circ f(T)^{-1})}{\tau} \quad (1)$$

Eq ??:

$$\begin{aligned} T &= \text{Exp}(\tau) = \exp(\tau^\wedge) \\ &= \exp\left(\sum_{j=1}^6 \mathbf{E}_j \tau_j\right), \quad j = 1, \dots, 6, \quad \tau \in \mathbb{R}^6. \end{aligned} \quad (2)$$

where the matrices  $\mathbf{E}_j \in \mathbb{R}^{4 \times 4}$  are the  $SE(3)$  group generators and form a basis for  $\mathfrak{se}(3)$ :

$$\begin{aligned} \mathbf{E}_1 &= \begin{bmatrix} 0 & 0 & 0 & 1 \\ 0 & 0 & 0 & 0 \\ 0 & 0 & 0 & 0 \\ 0 & 0 & 0 & 0 \end{bmatrix} & \mathbf{E}_2 &= \begin{bmatrix} 0 & 0 & 0 & 0 \\ 0 & 0 & 0 & 1 \\ 0 & 0 & 0 & 0 \\ 0 & 0 & 0 & 0 \end{bmatrix} \\ \mathbf{E}_3 &= \begin{bmatrix} 0 & 0 & 0 & 0 \\ 0 & 0 & 0 & 0 \\ 0 & 0 & 0 & 1 \\ 0 & 0 & 0 & 0 \end{bmatrix} & \mathbf{E}_4 &= \begin{bmatrix} 0 & 0 & 0 & 0 \\ 0 & 0 & -1 & 0 \\ 0 & 1 & 0 & 0 \\ 0 & 0 & 0 & 0 \end{bmatrix} \\ \mathbf{E}_5 &= \begin{bmatrix} 0 & 0 & 1 & 0 \\ 0 & 0 & 0 & 0 \\ -1 & 0 & 0 & 0 \\ 0 & 0 & 0 & 0 \end{bmatrix} & \mathbf{E}_6 &= \begin{bmatrix} 0 & -1 & 0 & 0 \\ 1 & 0 & 0 & 0 \\ 0 & 0 & 0 & 0 \\ 0 & 0 & 0 & 0 \end{bmatrix}. \end{aligned} \quad (3)$$

We get the partial derivative as follows:

$$\left. \frac{\partial}{\partial \tau_j} \exp(\tau^\wedge) \right|_{\tau=0} = \mathbf{E}_j, \quad j = 1, \dots, 6. \quad (4)$$

Therefore, the full derivative is given as:

$$\left. \frac{\partial T}{\partial \tau} \right|_{\tau=0} = T \frac{\partial \left( \sum_{j=1}^6 \mathbf{E}_j \tau_j \right)}{\partial \tau} \Big|_{\tau=0} \quad (5)$$

Since the meaningful elements of the camera  $T$  is 12 number variables, we stack the elements for  $12 \times 6$  matrix and we obtain

$$\left. \frac{\partial T}{\partial \tau} \right|_{\tau=0} = \begin{bmatrix} \mathbf{0} & -\mathbf{R}_{:,1}^\times \\ \mathbf{0} & -\mathbf{R}_{:,2}^\times \\ \mathbf{0} & -\mathbf{R}_{:,3}^\times \\ \mathbf{I} & -\mathbf{t}^\times \end{bmatrix}. \quad (6)$$

where  $\mathbf{R} \in SO(3)$  and  $\mathbf{t} \in \mathbb{R}^3$  denote the rotation and translation parts of  $T$ .

Eq ??:

$$\left. \frac{\partial \mathbf{n}_c}{\partial \tau} \right|_{\tau=0} = \frac{\mathcal{D}\mathbf{n}_c}{\mathcal{D}T_{CW}} = \lim_{\tau \rightarrow 0} \frac{\text{Exp}(\tau)\mathbf{n}_c - \mathbf{n}_c}{\tau} \quad (7)$$

$$= \lim_{\tau \rightarrow 0} \frac{(\mathbf{I} + \tau^\wedge) \cdot \mathbf{n}_c - \mathbf{n}_c}{\tau} \quad (8)$$

$$= \lim_{\tau \rightarrow 0} \frac{\tau^\wedge \cdot \mathbf{n}_c}{\tau} \quad (9)$$

$$= \lim_{\tau \rightarrow 0} \frac{\theta^\times \mathbf{n}_c + \rho}{\tau} \quad (10)$$

$$= \lim_{\tau \rightarrow 0} \frac{-\mathbf{n}_c^\times \theta + \rho}{\tau} \quad (11)$$

$$= [\mathbf{I} \quad -\mathbf{n}_c^\times] \quad (12)$$

### 3. Sim4D Training/Test Views

We define the training and test views on a sphere, with its center representing the target object. In spherical coordinates  $(r, \theta, \phi)$ , we set  $r = 2.0$ . The training view is sampled from two arcs on the sphere’s surface, defined by  $\theta \in [-10^\circ, 10^\circ]$  and  $\phi \in [-10^\circ, 10^\circ]$ . The test views are sampled from a circle on the sphere’s surface that pass through four key points:  $(\theta, \phi) = (5^\circ, 0^\circ), (0^\circ, 5^\circ), (-5^\circ, 0^\circ)$ , and  $(0^\circ, -5^\circ)$ . These points are chosen to ensure uniform sampling around the target object while maintaining a clear separation between the training and test views.

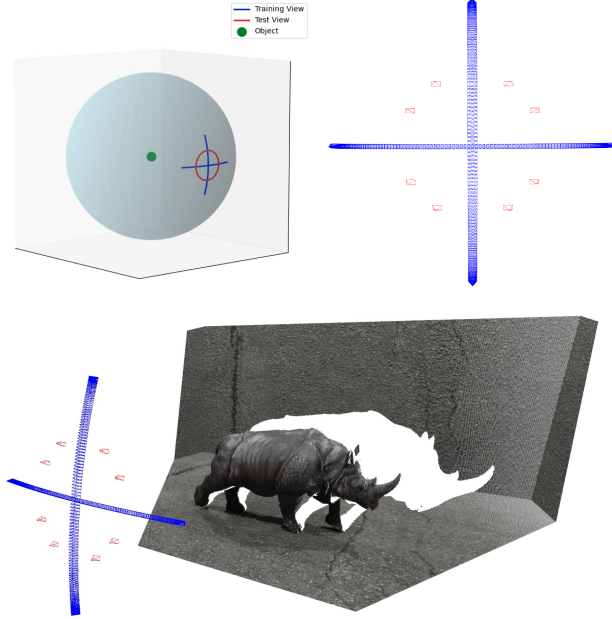

Figure 1. **Training and Test Views on the Sim4D Dataset:** Blue indicates training views, and Red indicates test views. Views are sampled (top right) from an arc on an object-centered sphere (top left) for dynamic scene reconstruction (bottom).

## 4. Further Ablation Analysis

### 4.1. Normal Rigidity Loss

Table 1 presents the quantitative results demonstrating the effect of the normal rigidity loss defined in Equation ?? . The normal rigidity loss improves the overall geometric metrics, such as camera ATE and L1 Depth, for the benchmark sequences by preserving the local geometric consistency of 2D Gaussians.

|                                    | ATE RMSE    | L1 Depth    | PSNR         | SSIM         | LPIPS       |
|------------------------------------|-------------|-------------|--------------|--------------|-------------|
| <b>Ours full</b>                   | <b>0.28</b> | <b>1.71</b> | 28.47        | 0.820        | <b>0.12</b> |
| <b>w/o <math>L_{ARAP-n}</math></b> | 0.52        | 2.00        | <b>29.04</b> | <b>0.853</b> | 0.13        |

Table 1. **Ablation Study on  $L_{ARAP-n}$ .** We report the average number of Sim4D dataset.

### 4.2. Monocular Depth Prior

While our method was primarily tested with RGB-D camera input, we conducted an ablation study using depth input from the state-of-the-art monocular prediction network [8], as shown in Table 5. The results demonstrate performance competitive with SurfelWarp, highlighting the potential for purely monocular non-rigid SLAM.

### 4.3. Static SLAM Ablation Analysis

**Replica:** Table 4 shows the photometric rendering performance analysis on the Replica dataset. The results demonstrate that the 2DGS-based SLAM approach offers an advantage in achieving accurate appearance reconstruction.

**TUM:** Table 2 presents the full ablation analysis on the TUM dataset. The 2DGS-based approach maintains competitive ATE and appearance metrics while achieving significantly better geometric rendering accuracy, as reflected in the Depth L1 error.

| Method    | Metric          | fr1          | fr2          | fr3          |
|-----------|-----------------|--------------|--------------|--------------|
| MonoGS    | ATE RMSE [cm] ↓ | <b>1.50</b>  | 1.44         | <b>1.49</b>  |
|           | Depth L1 [cm] ↓ | 6.2          | 13.0         | 13.0         |
|           | PSNR [dB] ↑     | 23.5         | <b>24.65</b> | <b>25.09</b> |
|           | SSIM ↑          | 0.775        | 0.785        | <b>0.842</b> |
|           | LPIPS ↓         | 0.261        | <b>0.201</b> | <b>0.200</b> |
| MonoGS-2D | ATE RMSE [cm] ↓ | 1.58         | <b>1.2</b>   | 1.83         |
|           | Depth L1 [cm] ↓ | <b>3.0</b>   | <b>2.3</b>   | <b>4.3</b>   |
|           | PSNR [dB] ↑     | <b>23.63</b> | 24.47        | 24.05        |
|           | SSIM ↑          | <b>0.782</b> | <b>0.79</b>  | 0.826        |
|           | LPIPS ↓         | <b>0.251</b> | 0.228        | 0.223        |

Table 2. **Static SLAM Ablation on TUM Dataset.** Comparison of ATE RMSE, Depth L1, and Rendering Performance Metrics.

**Memory Analysis** Table 3 presents the average memory usage on the TUM dataset sequences. Due to the geometrically accurate alignment, 2D Gaussians require fewer primitives to represent the scene, resulting in reduced memory consumption.

| Memory Usage [MB] |        |
|-------------------|--------|
| MonoGS-2D         | MonoGS |
| <b>2.73MB</b>     | 3.97MB |

Table 3. **Memory Analysis on TUM RGB-D dataset.**

### 4.4. Offline Non-Rigid RGB-D Reconstruction Ablation

Table 6 provides the full evaluation details of the offline non-rigid RGB-D reconstruction ablation analysis.

## References

- [1] Hongrui Cai, Wanquan Feng, Xuetao Feng, Yan Wang, and Juyong Zhang. Neural surface reconstruction of dynamic scenes with monocular rgb-d camera. In *Thirty-sixth Conference on Neural Information Processing Systems (NeurIPS)*, 2022. 1

|                  | Metric               | room0        | room1        | room2         | office0      | office1      | office2      | office3      | avg          |
|------------------|----------------------|--------------|--------------|---------------|--------------|--------------|--------------|--------------|--------------|
| MonoGS           | PSNR [dB] $\uparrow$ | 34.83        | 36.43        | 37.49         | 39.95        | 42.09        | 36.24        | 36.70        | 37.50        |
|                  | SSIM $\uparrow$      | 0.954        | 0.959        | 0.9665        | 0.971        | 0.977        | 0.964        | 0.963        | 0.96         |
|                  | LPIPS $\downarrow$   | 0.068        | 0.076        | 0.075         | 0.072        | 0.055        | 0.078        | 0.065        | 0.07         |
| <b>MonoGS-2D</b> | PSNR [dB] $\uparrow$ | <b>36.21</b> | <b>37.81</b> | <b>38.7</b>   | <b>43.45</b> | <b>43.8</b>  | <b>37.48</b> | <b>37.43</b> | <b>39.14</b> |
|                  | SSIM $\uparrow$      | <b>0.966</b> | <b>0.969</b> | <b>0.9737</b> | <b>0.985</b> | <b>0.984</b> | <b>0.972</b> | <b>0.971</b> | <b>0.975</b> |
|                  | LPIPS $\downarrow$   | <b>0.04</b>  | <b>0.042</b> | <b>0.044</b>  | <b>0.025</b> | <b>0.029</b> | <b>0.04</b>  | <b>0.039</b> | <b>0.038</b> |

Table 4. Static SLAM Ablation: Rendering Performance Metrics [5] on Replica Dataset

| Method           | Category   | Metric                    | curtain | flag  | mercedes | modular_vehicle | rhino | shoe_rack | water_effect | wave_toy |
|------------------|------------|---------------------------|---------|-------|----------|-----------------|-------|-----------|--------------|----------|
| Ours (Monocular) | Trajectory | ATE RMSE[cm] $\downarrow$ | 6.23    | 16.29 | 4.90     | 1.86            | 3.17  | 8.02      | 5.52         | 7.21     |
|                  | Geometry   | L1 Depth[cm] $\downarrow$ | 74.2    | 155   | 59.2     | 38.0            | 37.7  | 89.8      | 72.4         | 80.8     |
|                  | Appearance | PSNR [dB] $\uparrow$      | 17.73   | 16.22 | 20.72    | 26.28           | 21.48 | 17.49     | 18.86        | 17.98    |
|                  |            | SSIM $\uparrow$           | 0.461   | 0.455 | 0.636    | 0.578           | 0.253 | 0.448     | 0.390        | 0.441    |
|                  |            | LPIPS $\downarrow$        | 0.297   | 0.517 | 0.282    | 0.380           | 0.339 | 0.391     | 0.258        | 0.281    |

Table 5. **Non-rigid SLAM Evaluation on Sim4D Dataset with Monocular Depth Prior.**

- [2] Jonathon Luiten, Georgios Kopanas, Bastian Leibe, and Deva Ramanan. Dynamic 3d gaussians: Tracking by persistent dynamic view synthesis. *3DV*, 2024. 1
- [3] Hidenobu Matsuki, Riku Murai, Paul H. J. Kelly, and Andrew J. Davison. Gaussian Splatting SLAM. 2024. 1
- [4] Thomas Müller. tiny-cuda-nn, 2021. 1
- [5] Erik Sandström, Yue Li, Luc Van Gool, and Martin R. Oswald. Point-slam: Dense neural point cloud-based slam. In *Proceedings of the International Conference on Computer Vision (ICCV)*, 2023. 1, 3
- [6] J. Solà, J. Deray, and D. Atchuthan. A micro Lie theory for state estimation in robotics. *arXiv:1812.01537*, 2018. 1
- [7] Hengyi Wang, Jingwen Wang, and Lourdes Agapito. Morphheus: Neural dynamic 360deg surface reconstruction from monocular rgb-d video. In *Proceedings of the IEEE/CVF Conference on Computer Vision and Pattern Recognition*, pages 20965–20976, 2024. 1, 4
- [8] Ruicheng Wang, Sicheng Xu, Cassie Dai, Jianfeng Xiang, Yu Deng, Xin Tong, and Jiaolong Yang. Moge: Unlocking accurate monocular geometry estimation for open-domain images with optimal training supervision, 2024. 2
- [9] Ziyi Yang, Xinyu Gao, Wen Zhou, Shaohui Jiao, Yuqing Zhang, and Xiaogang Jin. Deformable 3d gaussians for high-fidelity monocular dynamic scene reconstruction. 2024. 1

|              |                      | KillingFusion |       |        | DeepDeform |        |        | iPhone |       |       |
|--------------|----------------------|---------------|-------|--------|------------|--------|--------|--------|-------|-------|
|              |                      | frog          | duck  | snoopy | seq002     | seq004 | seq028 | teddy  | mochi | haru  |
| Morpheus [7] | Depth L1 [cm]        | 4.37          | 3.01  | 2.30   | 2.08       | 1.24   | 2.26   | 5.40   | 0.31  | 1.63  |
|              | PSNR [dB] $\uparrow$ | 27.2          | 28.17 | 25.73  | 27.21      | 26.94  | 26.30  | 23.40  | 28.12 | 24.34 |
|              | SSIM $\uparrow$      | 0.802         | 0.716 | 0.779  | 0.809      | 0.823  | 0.795  | 0.237  | 0.623 | 0.510 |
|              | LPIPS $\downarrow$   | 0.31          | 0.419 | 0.483  | 0.301      | 0.428  | 0.397  | 0.776  | 0.55  | 0.564 |
| Ours         | Depth L1 [cm]        | 0.65          | 1.91  | 12.1   | 0.78       | 1.07   | 1.30   | 0.32   | 0.22  | 0.12  |
|              | PSNR [dB] $\uparrow$ | 33.72         | 32.75 | 26.95  | 24.36      | 24.13  | 24.02  | 23.89  | 36.15 | 22.60 |
|              | SSIM $\uparrow$      | 0.941         | 0.949 | 0.899  | 0.897      | 0.897  | 0.902  | 0.739  | 0.926 | 0.690 |
|              | LPIPS $\downarrow$   | 0.063         | 0.073 | 0.257  | 0.245      | 0.313  | 0.241  | 0.259  | 0.131 | 0.391 |

Table 6. **Offline RGB-D Reconstruction Results**
